# MIND TO MIND

*Creative writing that explores the abstract side  
of our profession and our lives*

*Carol Wiley Cassella, M.D., Editor*

## An Anesthesia Resident's Prayer

Jody C. Leng, M.D., M.S.\*

N

Now I lay me down to sleep  
I pray this pager does not beep

Please no risky extubations  
Please no lengthy explanations

Please no 4AM calls for section  
Please no swallowed razors in corrections

In this county, please no riots  
Keep all the guns locked up and quiet

Keep the drunks out of their cars  
Keep rabble-rousers behind bars

Keep all jigsaws out of hands  
Keep all the Nattys in their cans

Keep all the rusty knives in blocks  
Let all the crack stay formed in rocks

Let all the brains stay mass effectless  
Give all the semi-urgents breakfast

Let every epidural work  
Let no vascular disasters lurk

Let nobody's water break  
Let nobody's RLQ ache

Let me not hear that timeout bell  
Let not one fetus have decels

Let no heart failure be end stage —  
Beep beep beep... "This is anesthesia, returning a page..."

\* Stanford Hospital, Stanford, California. cimbalo@stanfordalumni.org

Accepted for publication April 25, 2013.

Copyright © 2013, the American Society of Anesthesiologists, Inc. Lippincott Williams & Wilkins. Anesthesiology 2013; 119:483
